# Supplementary material
Source: Copernicus journal article supplement (doi:10.5194/egqsj-8-187-1957)
Supplement: Supplementary file 1 [file egqsj-8-187-1957-supplement.pdf]

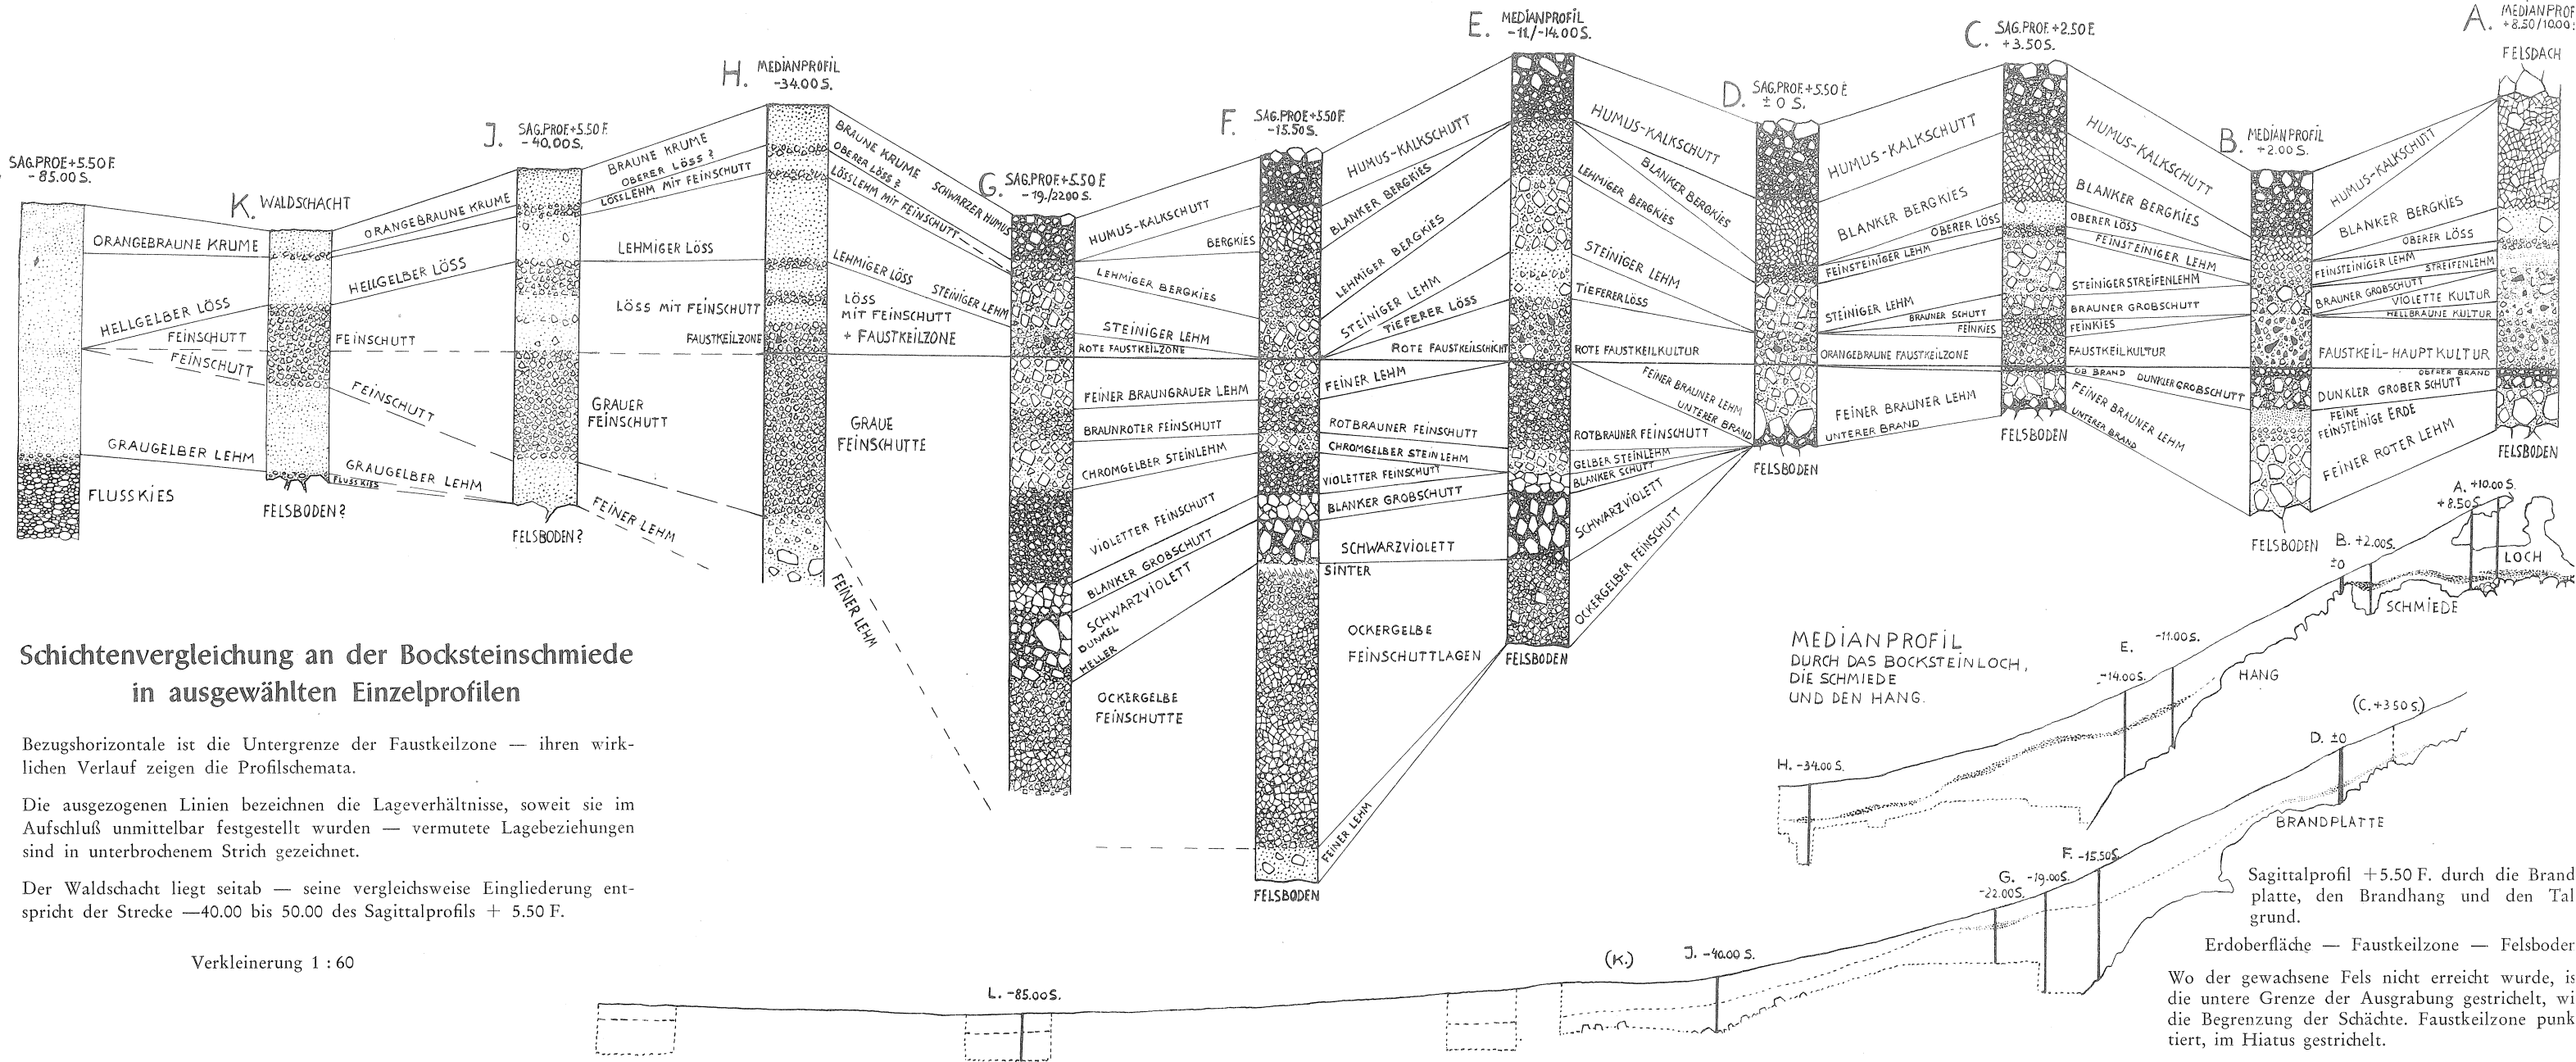

**Schichtenvergleich an der Bocksteinschmiede in ausgewählten Einzelprofilen**

Bezugshorizontale ist die Untergrenze der Faustkeilzone — ihren wirklichen Verlauf zeigen die Profilschemata.

Die ausgezogenen Linien bezeichnen die Lageverhältnisse, soweit sie im Aufschluß unmittelbar festgestellt wurden — vermutete Lagebeziehungen sind in unterbrochenem Strich gezeichnet.

Der Waldschacht liegt seitab — seine vergleichsweise Eingliederung entspricht der Strecke —40.00 bis 50.00 des Sagittalprofils + 5.50 F.

Verkleinerung 1 : 60

Verkleinerung 1 : 400

MEDIANPROFIL DURCH DAS BOCKSTEINLOCH, DIE SCHMIEDE UND DEN HANG.

Sagittalprofil +5.50 F. durch die Brandplatte, den Brandhang und den Talgrund.

Erdoberfläche — Faustkeilzone — Felsboden

Wo der gewachsene Fels nicht erreicht wurde, ist die untere Grenze der Ausgrabung gestrichelt, wie die Begrenzung der Schächte. Faustkeilzone punktiert, im Hiatus gestrichelt.
